# Supplementary material
Source: MDPI journal article supplement (https://www.mdpi.com/2073-4395/14/5/1060)
Supplement: s1 [file s1]

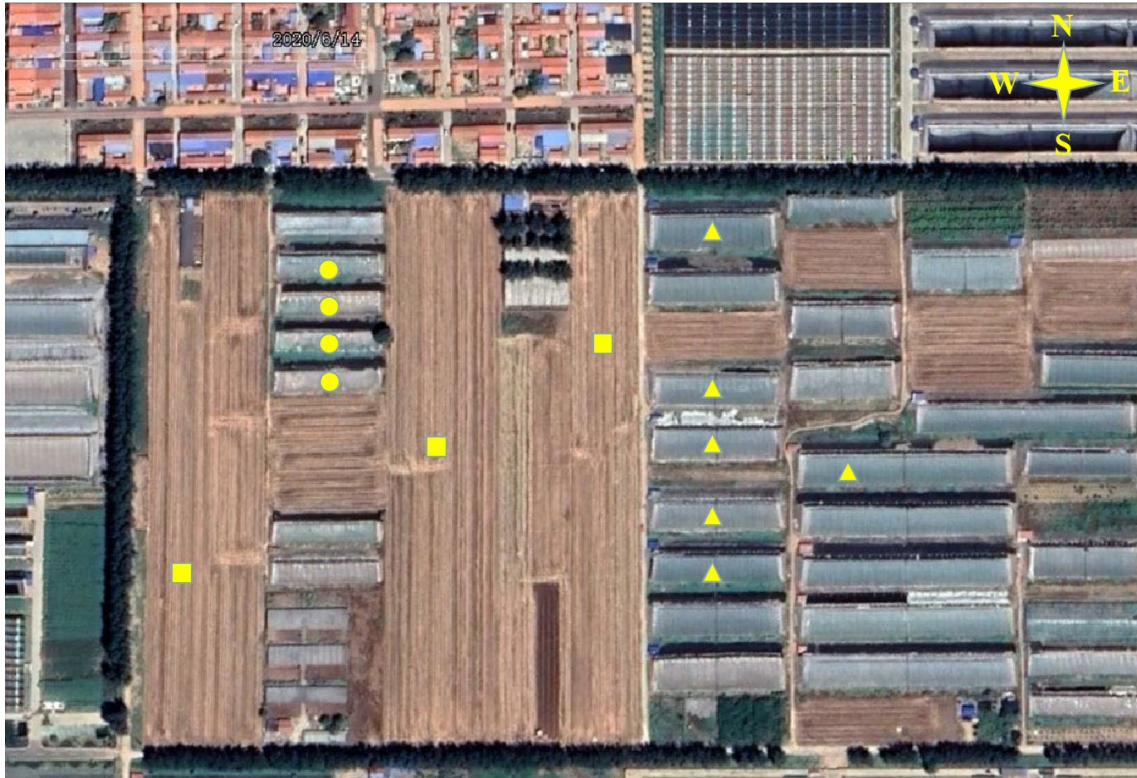

**Figure S1.** Satellite picture of sampling points. The yellow square, triangle and circle in the picture represents the wheat-maize fields, 10-year and 20-year old pepper greenhouses, respectively.

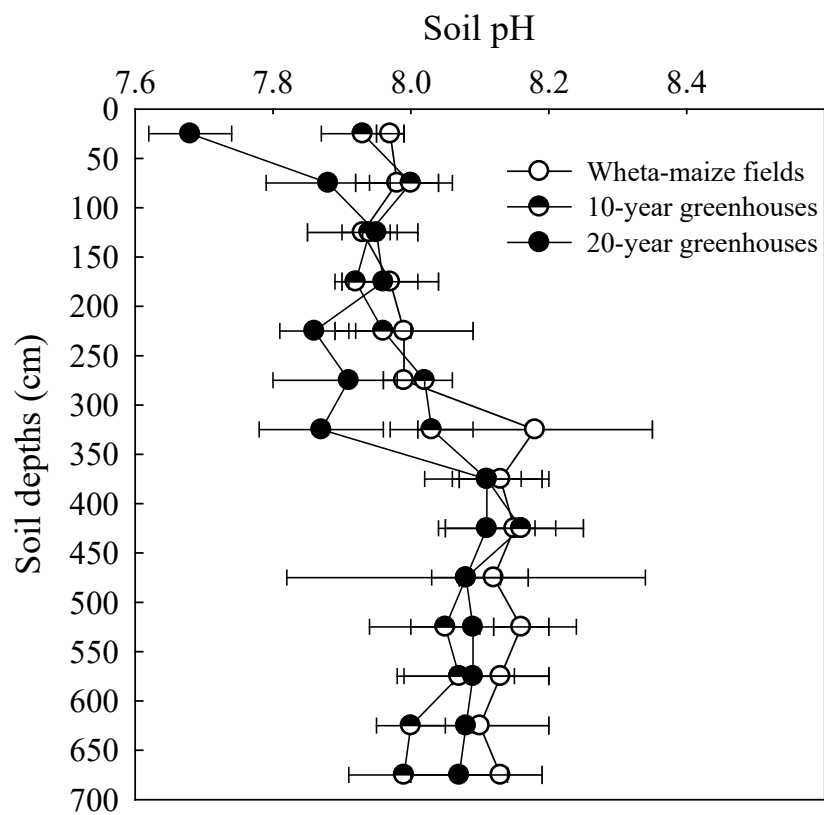

**Figure S2.** The soil pH of different depths for wheat-maize fields (n=3), 10-year (n=6) and 20-year (n=4) old pepper greenhouses. Given are mean values $\pm$ SE.

**Table S1.** The amount of N input, crops yield and N uptake of sampling wheat (W)-maize (M) fields and pepper greenhouses.

|                                     | N input (kg N ha <sup>-1</sup> yr <sup>-1</sup> ) |                        |                                  |                | Yield<br>(t ha <sup>-1</sup> yr <sup>-1</sup> ) |        | Crops<br>N uptake <sup>b</sup><br>(kg N ha <sup>-1</sup> yr <sup>-1</sup> ) |
|-------------------------------------|---------------------------------------------------|------------------------|----------------------------------|----------------|-------------------------------------------------|--------|-----------------------------------------------------------------------------|
|                                     | Organic<br>fertilizer                             | Chemical<br>fertilizer | Irrigation<br>water <sup>a</sup> | Total<br>input |                                                 |        |                                                                             |
| <b>Wheat (W) – maize (M) fields</b> |                                                   |                        |                                  |                |                                                 |        |                                                                             |
| 1                                   | 0                                                 | 450                    | 65                               | 515            | W 7.50                                          | M 9.00 | 399                                                                         |
| 2                                   | 0                                                 | 450                    | 65                               | 515            | W 7.50                                          | M 9.00 | 399                                                                         |
| 3                                   | 0                                                 | 450                    | 65                               | 515            | W 7.50                                          | M 9.00 | 399                                                                         |
| Mean                                | 0                                                 | 450                    | 65                               | 515            | W 7.50                                          | M 9.00 | 399                                                                         |
| SE                                  | 0                                                 | 0                      | 0                                | 0              | W 0                                             | M 0    | 0                                                                           |
| <b>10-yr old pepper greenhouses</b> |                                                   |                        |                                  |                |                                                 |        |                                                                             |
| 1                                   | 1050                                              | 1380                   | 210                              | 2640           | 165                                             |        | 825                                                                         |
| 2                                   | 922                                               | 776                    | 210                              | 1908           | 150                                             |        | 750                                                                         |
| 3                                   | 1165                                              | 772                    | 210                              | 2147           | 165                                             |        | 825                                                                         |
| 4                                   | 1050                                              | 1164                   | 210                              | 2424           | 165                                             |        | 825                                                                         |
| 5                                   | 1286                                              | 776                    | 210                              | 2272           | 150                                             |        | 750                                                                         |
| 6                                   | 1165                                              | 772                    | 210                              | 2147           | 165                                             |        | 825                                                                         |
| Mean                                | 1106                                              | 940                    | 210                              | 2256           | 160                                             |        | 800                                                                         |
| SE                                  | 51                                                | 109                    | 0                                | 103            | 3                                               |        | 16                                                                          |
| <b>20-yr old pepper greenhouses</b> |                                                   |                        |                                  |                |                                                 |        |                                                                             |
| 1                                   | 1133                                              | 1669                   | 150                              | 2952           | 143                                             |        | 713                                                                         |
| 2                                   | 809                                               | 1393                   | 150                              | 2352           | 135                                             |        | 675                                                                         |
| 3                                   | 528                                               | 1228                   | 150                              | 1906           | 150                                             |        | 750                                                                         |
| 4                                   | 729                                               | 2328                   | 150                              | 3207           | 128                                             |        | 638                                                                         |
| Mean                                | 800                                               | 1655                   | 150                              | 2604           | 139                                             |        | 694                                                                         |
| SE                                  | 126                                               | 242                    | 0                                | 294            | 5                                               |        | 24                                                                          |

<sup>a</sup> The average N concentration of irrigation water in the sampling area was 13.3 mg N L<sup>-1</sup> from 2008 to 2011 [9] and 23.4 mg N L<sup>-1</sup> from 2016 to 2019 [13]. The N concentration of irrigation water in wheat-maize fields and 20-year greenhouses is calculated as 13.3 mg N L<sup>-1</sup> on average and that in 10-year greenhouses is calculated as 18.3 mg N L<sup>-1</sup> on average.

<sup>b</sup> The N uptake of per 100 kg wheat grain, maize grain and pepper yield in the sampling area were approximately 2.98 kg, 1.95 kg and 0.50 kg, respectively, according to literature reports. (Table S4)

**Table S2.** The amount of N input, crops yield and N uptake of wheat (W)-maize (M) fields and pepper greenhouses according to the interview of individual farmers around the sampling point.

|                              | N input (kg N ha <sup>-1</sup> yr <sup>-1</sup> ) |                        |                                  |                | Yield<br>(t ha <sup>-1</sup> yr <sup>-1</sup> ) |        | Corps N uptake <sup>b</sup><br>(kg N ha <sup>-1</sup> yr <sup>-1</sup> ) |
|------------------------------|---------------------------------------------------|------------------------|----------------------------------|----------------|-------------------------------------------------|--------|--------------------------------------------------------------------------|
|                              | Organic<br>fertilizer                             | Chemical<br>fertilizer | Irrigation<br>water <sup>a</sup> | Total<br>input |                                                 |        |                                                                          |
| Wheat (W) – maize (M) fields |                                                   |                        |                                  |                |                                                 |        |                                                                          |
| 1                            | 0                                                 | 225                    | 65                               | 290            | W 6.75                                          | M 7.50 | 347                                                                      |
| 2                            | 0                                                 | 450                    | 65                               | 515            | W 7.50                                          | M 9.00 | 399                                                                      |
| 3                            | 0                                                 | 450                    | 65                               | 515            | W 7.50                                          | M 9.00 | 399                                                                      |

|                                       |      |      |     |      |               |     |
|---------------------------------------|------|------|-----|------|---------------|-----|
| 4                                     | 0    | 540  | 65  | 605  | W 11.3 M 7.50 | 482 |
| 5                                     | 0    | 225  | 65  | 290  | W 6.75 M 7.50 | 347 |
| Mean                                  | 0    | 378  | 65  | 443  | W 7.95 M 8.10 | 395 |
| SE                                    | 0    | 65   | 0   | 65   | W 0.84 M 0.37 | 25  |
| <b>10-year old pepper greenhouses</b> |      |      |     |      |               |     |
| 1                                     | 1006 | 582  | 210 | 1798 | 135.0         | 675 |
| 2                                     | 1003 | 1164 | 210 | 2377 | 142.5         | 713 |
| 3                                     | 1003 | 1164 | 210 | 2377 | 142.5         | 713 |
| 4                                     | 1058 | 1494 | 210 | 2762 | 187.5         | 938 |
| 5                                     | 1739 | 582  | 210 | 2531 | 165.0         | 825 |
| 6                                     | 1006 | 582  | 210 | 1798 | 135.0         | 675 |
| Mean                                  | 1136 | 928  | 210 | 2274 | 151.3         | 756 |
| SE                                    | 121  | 162  | 0   | 161  | 8.5           | 43  |
| <b>20-year old pepper greenhouses</b> |      |      |     |      |               |     |
| 1                                     | 582  | 1739 | 150 | 2471 | 165.0         | 825 |
| 2                                     | 507  | 1682 | 150 | 2339 | 135.0         | 675 |
| 3                                     | 943  | 1399 | 150 | 2492 | 150.0         | 750 |
| 4                                     | 1707 | 1092 | 150 | 2949 | 131.3         | 656 |
| 5                                     | 569  | 2010 | 150 | 2729 | 165.0         | 825 |
| Mean                                  | 862  | 1584 | 150 | 2596 | 149.3         | 746 |
| SE                                    | 225  | 157  | 0   | 108  | 7.1           | 36  |

<sup>a</sup> The average N concentration of irrigation water in the sampling area was 13.3 mg N L<sup>-1</sup> from 2008 to 2011 [9] and 23.4 mg N L<sup>-1</sup> from 2016 to 2019 [13]. The N concentration of irrigation water in wheat-maize fields and 20-year old greenhouses is calculated as 13.3 mg N L<sup>-1</sup> on average and that in 10-year old greenhouses is calculated as 18.3 mg N L<sup>-1</sup> on average.

<sup>b</sup> The N uptake of per 100 kg wheat grain, maize grain and pepper yield in the sampling area were approximately 2.98 kg, 1.95 kg and 0.50 kg, respectively, according to literature reports. (Table S4)

**Table S3.** Soil bulk density at different depths of wheat-maize fields, 10-year and 20-year old pepper greenhouses.

| Depths<br>(cm) | Wheat-maize fields<br>(g cm <sup>-3</sup> ) | 10-year greenhouses<br>(g cm <sup>-3</sup> ) | 20-year greenhouses<br>(g cm <sup>-3</sup> ) |
|----------------|---------------------------------------------|----------------------------------------------|----------------------------------------------|
| 0–50           | 1.69                                        | 1.74                                         | 1.73                                         |
| 50–100         | 1.79                                        | 1.74                                         | 1.73                                         |
| 100–150        | 1.75                                        | 1.71                                         | 1.64                                         |
| 150–200        | 1.75                                        | 1.71                                         | 1.64                                         |
| 200–250        | 1.61                                        | 1.77                                         | 1.59                                         |
| 250–300        | 1.61                                        | 1.77                                         | 1.59                                         |
| 300–350        | 1.68                                        | 1.74                                         | 1.79                                         |
| 350–400        | 1.68                                        | 1.74                                         | 1.79                                         |

|         |      |      |      |
|---------|------|------|------|
| 400–450 | 1.51 | 1.80 | 1.67 |
| 450–500 | 1.51 | 1.80 | 1.67 |
| 500–550 | 1.60 | 1.68 | 1.82 |
| 550–600 | 1.60 | 1.68 | 1.82 |
| 600–650 | 1.45 | 1.69 | 1.57 |
| 650–700 | 1.45 | 1.83 | 1.57 |

**Table S4.** Nitrogen (N) requirement of per 100 kg grain or yield for wheat, maize and greenhouse pepper in northern China from references.

|        | Number of samples | The amount of N uptake<br>(kg N ha <sup>-1</sup> ) | Reference |
|--------|-------------------|----------------------------------------------------|-----------|
| Wheat  | 2824              | 2.98 ± 0.014                                       | [47]      |
| Maize  | 391               | 1.95 ± 0.012                                       | [48]      |
| Pepper | 7                 | 0.50 ± 0.066                                       | [49, 50]  |
